# Supplementary material for: Highly Conserved Elements and Chromosome Structure Evolution in Mitochondrial Genomes in Ciliates
Source: MDPI journal article supplement (doi:10.3390/life7010009), 2017-02-27
Supplement: s2 [file s2]

## Reconstruction of mitochondrial chromosome structures in ciliates

The root and its two direct descendants have two chromosomes (linear and circular). Other internal nodes have one linear chromosome. Each non-terminal node is represented by its two most distant descendant leafs. Events are shown for the incoming tree edge.

| Node                                             | Chromosome Structure                                                                                                                                                                                                                                                                                                                                                                                                    | Events        |
|--------------------------------------------------|-------------------------------------------------------------------------------------------------------------------------------------------------------------------------------------------------------------------------------------------------------------------------------------------------------------------------------------------------------------------------------------------------------------------------|---------------|
| <i>T. thermophila</i> (I)                        | *trnY *rnl_a_1 *trnL_1 *rnl_b_1 *ymf57 *ymf66<br>*ymf76 *rps13 *rps3 *rps19 *rpl2 *ymf74 *nad10<br>*rps12 *nad2 nad7 rps14 ymf60 *ymf64 *ymf75 *trnF<br>*nad1_b *atp9 *ymf63 *ymf65 *ymf69 *ymf59 *rpl16<br>*yejR *ymf61 *trnH *nad3 *ymf72 *nad4L *nad9_2<br>*nad9_1 *ymf77 cob nad5 cox2 rns_a rns_b ymf56<br>ymf67 trnW ymf68 ymf71 cox1 nad1_a ymf62 rpl14<br>trnE ymf70 nad4 ymf73 rnl_b_2 trnL_2 rnl_a_2 trnM (L) | no events     |
| <i>T. malaccensis</i> (I)                        | *trnY *rnl_a_1 *trnL_1 *rnl_b_1 *ymf57 *ymf66<br>*ymf76 *rps13 *rps3 *rps19 *rpl2 *ymf74 *nad10<br>*rps12 *nad2 nad7 rps14 ymf60 *ymf64 *ymf75 *trnF<br>*nad1_b *atp9 *ymf63 *ymf65 *ymf69 *ymf59 *rpl16<br>*yejR *ymf61 *trnH *nad3 *ymf72 *nad4L *nad9_2<br>*nad9_1 *ymf77 cob nad5 cox2 rns_a rns_b ymf56<br>ymf67 trnW ymf68 ymf71 cox1 nad1_a ymf62 rpl14<br>trnE ymf70 nad4 ymf73 rnl_b_2 trnL_2 rnl_a_2 trnM (L) | no events     |
| <i>T. thermophila</i> –<br><i>T. malaccensis</i> | *trnY *rnl_a_1 *trnL_1 *rnl_b_1 *ymf57 *ymf66<br>*ymf76 *rps13 *rps3 *rps19 *rpl2 *ymf74 *nad10<br>*rps12 *nad2 nad7 rps14 ymf60 *ymf64 *ymf75 *trnF<br>*nad1_b *atp9 *ymf63 *ymf65 *ymf69 *ymf59 *rpl16<br>*yejR *ymf61 *trnH *nad3 *ymf72 *nad4L *nad9_2<br>*nad9_1 *ymf77 cob nad5 cox2 rns_a rns_b ymf56<br>ymf67 trnW ymf68 ymf71 cox1 nad1_a ymf62 rpl14<br>trnE ymf70 nad4 ymf73 rnl_b_2 trnL_2 rnl_a_2 trnM (L) | 1 duplication |
| <i>T. paravorax</i> (I)                          | *trnY *rnl_a_1 *trnL_1 *rnl_b_1 *ymf57 *ymf66<br>*ymf76 *rps13 *rps3 *rps19 *rpl2 *ymf74 *nad10<br>*rps12 *nad2 nad7 rps14 ymf60 *ymf64 *ymf75 *trnF<br>*nad1_b *atp9 *ymf63 *ymf65 *ymf69 *ymf59 *rpl16<br>*yejR *ymf61 *trnH *nad3 *ymf72 *nad4L *nad9_1<br>*ymf77 cob nad5 cox2 rns_a rns_b ymf56 ymf67 trnW<br>ymf68 ymf71 cox1 nad1_a ymf62 rpl14 trnE ymf70 nad4<br>ymf73 rnl_b_2 trnL_2 rnl_a_2 trnM (L)         | no events     |
| <i>T. paravorax</i> –<br><i>T. malaccensis</i>   | *trnY *rnl_a_1 *trnL_1 *rnl_b_1 *ymf57 *ymf66<br>*ymf76 *rps13 *rps3 *rps19 *rpl2 *ymf74 *nad10<br>*rps12 *nad2 nad7 rps14 ymf60 *ymf64 *ymf75 *trnF<br>*nad1_b *atp9 *ymf63 *ymf65 *ymf69 *ymf59 *rpl16<br>*yejR *ymf61 *trnH *nad3 *ymf72 *nad4L *nad9_1<br>*ymf77 cob nad5 cox2 rns_a rns_b ymf56 ymf67 trnW<br>ymf68 ymf71 cox1 nad1_a ymf62 rpl14 trnE ymf70 nad4<br>ymf73 rnl_b_2 trnL_2 rnl_a_2 trnM (L)         | no events     |

| Node                                            | Chromosome Structure                                                                                                                                                                                                                                                                                                                                                                                            | Events                                                                                                                                                       |
|-------------------------------------------------|-----------------------------------------------------------------------------------------------------------------------------------------------------------------------------------------------------------------------------------------------------------------------------------------------------------------------------------------------------------------------------------------------------------------|--------------------------------------------------------------------------------------------------------------------------------------------------------------|
| <i>T. pigmentosa</i> (I)                        | *trnY *rnl_a_1 *trnL_1 *rnl_b_1 *ymf57 *ymf66<br>*ymf76 *rps13 *rps3 *rps19 *rpl2 *ymf74 *nad10<br>*rps12 *nad2 nad7 rps14 ymf60 *ymf64 *ymf75 trnF<br>*nad1_b *atp9 *ymf63 *ymf65 *ymf69 *ymf59 *rpl16<br>*yejR *ymf61 trnH *nad3 *ymf72 *nad4L *nad9_1<br>*ymf77 cob nad5 cox2 rns_a rns_b ymf56 ymf67 trnW<br>ymf68 ymf71 cox1 nad1_a ymf62 rpl14 trnE ymf70 nad4<br>ymf73 rnl_b_2 trnL_2 rnl_a_2 trnM (L)   | 2 inversions                                                                                                                                                 |
| <i>T. paravorax</i> –<br><i>T. pigmentosa</i>   | *trnY *rnl_a_1 *trnL_1 *rnl_b_1 *ymf57 *ymf66<br>*ymf76 *rps13 *rps3 *rps19 *rpl2 *ymf74 *nad10<br>*rps12 *nad2 nad7 rps14 ymf60 *ymf64 *ymf75 *trnF<br>*nad1_b *atp9 *ymf63 *ymf65 *ymf69 *ymf59 *rpl16<br>*yejR *ymf61 *trnH *nad3 *ymf72 *nad4L *nad9_1<br>*ymf77 cob nad5 cox2 rns_a rns_b ymf56 ymf67 trnW<br>ymf68 ymf71 cox1 nad1_a ymf62 rpl14 trnE ymf70 nad4<br>ymf73 rnl_b_2 trnL_2 rnl_a_2 trnM (L) | no events                                                                                                                                                    |
| <i>T. pyriformis</i> (I)                        | *trnY *rnl_a_1 *trnL_1 *rnl_b_1 *ymf57 *ymf66<br>*ymf76 *rps13 *rps3 *rps19 *rpl2 *ymf74 *nad10<br>*rps12 *nad2 nad7 rps14 rp16 *ymf64 *ymf75 *trnF<br>*nad1_b *atp9 *ymf63 *ymf65 *ymf69 *ymf59 *rpl16<br>*yejR *ymf61 *trnH *nad3 *ymf72 *nad4L *nad9_1<br>*ymf77 cob nad5 cox2 rns_a rns_b ymf56 ymf67 trnW<br>ymf68 ymf71 cox1 nad1_a ymf62 rpl14 trnE ymf70 nad4<br>ymf73 rnl_b_2 trnL_2 rnl_a_2 trnM (L)  | 1 gene substitution                                                                                                                                          |
| <i>T. paravorax</i> –<br><i>T. pyriformis</i>   | *trnY *rnl_a_1 *trnL_1 *rnl_b_1 *ymf57 *ymf66<br>*ymf76 *rps13 *rps3 *rps19 *rpl2 *ymf74 *nad10<br>*rps12 *nad2 nad7 rps14 ymf60 *ymf64 *ymf75 *trnF<br>*nad1_b *atp9 *ymf63 *ymf65 *ymf69 *ymf59 *rpl16<br>*yejR *ymf61 *trnH *nad3 *ymf72 *nad4L *nad9_1<br>*ymf77 cob nad5 cox2 rns_a rns_b ymf56 ymf67 trnW<br>ymf68 ymf71 cox1 nad1_a ymf62 rpl14 trnE ymf70 nad4<br>ymf73 rnl_b_2 trnL_2 rnl_a_2 trnM (L) | 6 gene gains                                                                                                                                                 |
| <i>I. multifiliis</i> (I)                       | *trnY *rnl_a_1 *rnl_b_1 *ymf66 *ymf57 *ymf76 *rps13<br>*rps3 *rps19 *rpl2 *nad10 *rps12 *nad2 nad7 rps14<br>ymf60 *ymf64 *ymf75 *trnF *atp9 *ymf63 *ymf65<br>*ymf59 *rpl16 *yejR *ymf61 *nad3 *nad4L *nad9_1<br>*ymf77 *nad1_b cob nad5 cox2 rns_a rns_b ymf67 trnW<br>ymf68 cox1 nad1_a ymf62 rpl14 ymf70 nad4 ymf73 trnE<br>rnl_b_2 rnl_a_2 trnY_2 (C)                                                        | 2 gene losses,<br>1 gene substitution,<br>2 transpositions,<br>1 chromosome cycling                                                                          |
| <i>I. multifiliis</i> –<br><i>T. Pyriformis</i> | *trnY *rnl_a_1 *rnl_b_1 *ymf57 *ymf66 *ymf76 *rps13<br>*rps3 *rps19 *rpl2 *nad10 *rps12 *nad2 nad7 rps14<br>ymf60 *ymf64 *ymf75 *trnF *nad1_b *atp9 *ymf63<br>*ymf65 *ymf59 *rpl16 *yejR *ymf61 *trnH *nad3<br>*nad4L *nad9_1 *ymf77 cob nad5 cox2 rns_a rns_b<br>ymf56 ymf67 trnW ymf68 cox1 nad1_a ymf62 rpl14<br>trnE ymf70 nad4 ymf73 rnl_b_2 rnl_a_2 trnM (L)                                              | 1 region insertion,<br>4 gene gains,<br>1 gene substitution,<br>1 transversion,<br>1 transposition,<br>1 insertion of circular<br>chromosome into linear one |

| Node                                        | Chromosome Structure                                                                                                                                                                                                                                                                                                                                                                                       | Events                                                                                                                                                                |
|---------------------------------------------|------------------------------------------------------------------------------------------------------------------------------------------------------------------------------------------------------------------------------------------------------------------------------------------------------------------------------------------------------------------------------------------------------------|-----------------------------------------------------------------------------------------------------------------------------------------------------------------------|
| <i>P. aurelia</i> (I)                       | *trnY *rnl_b *trnM *rnl_a *ymf66_1 *ymf66 *ymf57<br>*nad4 *ymf80 *rpl14 *ymf62 *nad1_a *cox1 *ymf68<br>*trnW *ymf67_b *ymf67_a *ymf56 *rns_b *rns_a<br>*cox2 *nad5 *cob *ymf81 *ymf85 *rps13 *rps3 *rpl2<br>*ymf84 *nad10 *rps12 *nad2_a nad7 rps14 ymf79<br>ymf60 *ymf64 *ymf86 *ymf83 *atp9 *ymf63 *nad1_b<br>*trnF *ymf65 *ymf65_1 *ymf78 *ymf59 *rpl16 *ymf82<br>*yejR *ymf61 *nad3 *nad4L *nad9_1 (L) | 2 gene gains<br>3 duplications,<br>2 gene losses,<br>1 region insertion                                                                                               |
| <i>P. caudatum</i> (I)                      | *trnY *rnl_a_1 *rnl_b_1 *ymf66 *ymf57 *nad4 *ymf80<br>*rpl14 *nad6 *nad1_a *cox1 *ymf68 *trnW *ymf67_a<br>*ymf56 *rns_b *rns_a *cox2 *nad5 *cob *ymf76 *rps13<br>*rps3 *rps19 *rpl2 *ymf84 *nad10 *rps12 *nad2_a nad7<br>rps14 ymf79 rpl6 *ymf64 *ymf83 *atp9 *ymf63 *ymf87<br>*nad1_b *trnF *ymf65 *ymf78 *ymf59 *rpl16 *yejR<br>*ymf61 *nad3 *nad4L *nad9_1 (L)                                          | 2 gene substitutions,<br>1 gene loss,<br>1 gene gain                                                                                                                  |
| <i>P. aurelia</i> –<br><i>P. caudatum</i>   | *trnY *rnl_a_1 *rnl_b_1 *trnM *ymf66 *ymf57 *nad4<br>*ymf80 *rpl14 *ymf62 *nad1_a *cox1 *ymf68 *trnW<br>*ymf67_a *ymf56 *rns_b *rns_a *cox2 *nad5 *cob<br>*ymf76 *rps13 *rps3 *rps19 *rpl2 *ymf84 *nad10<br>*rps12 *nad2_a nad7 rps14 ymf79 ymf60 *ymf64<br>*ymf83 *atp9 *ymf63 *nad1_b *trnF *ymf65 *ymf78<br>*ymf59 *rpl16 *yejR *ymf61 *nad3 *nad4L *nad9_1<br>(L)                                      | 1 gene loss,<br>5 gene gains,<br>1 gene substitution,<br>1 inversion,<br>1 transposition,<br>1 transversion,<br>1 insertion of circular<br>chromosome into linear one |
| <i>P. aurelia</i> –<br><i>T. pyriformis</i> | *trnM *ymf66 *ymf76 *rps13 *rps3 *rps19 *rpl2<br>*nad10 *rps12 *nad2_a nad7 rps14 ymf60 *ymf64 *trnF<br>*ymf65 *ymf59 *rpl16 *yejR *ymf61 *trnH *nad3<br>*nad4L *nad9_1 cob nad5 cox2 rns_a rns_b ymf56 trnW<br>ymf68 cox1 nad1_a ymf62 rpl14 trnE nad4 ymf57<br>rnl_b_1 rnl_a_1 trnY (L)<br>nad1_b ymf63 atp9 (C)                                                                                         | 1 gene gain,<br>1 region insertion,<br>2 inversions,<br>4 transpositions,<br>2 transversions                                                                          |
| <i>M. minuta</i> (I)                        | *nad5 *ccmF *cytb *trnM *rnl *cox2 *rpl14 *cox1<br>*nad4L *rps3_b *trnW *rns *trnY trnF nad9_1 nad2_a<br>rpl16 nad4 rps12 nad10 rpl2 rps4 nad7 nad1_b trnG atp9<br>nad3 trnH nad1_a (L)                                                                                                                                                                                                                    | no events                                                                                                                                                             |
| <i>M. crassus</i> (I)                       | *nad5 *ccmF *cytb *trnM *rnl *cox2 *rpl14 *cox1<br>*nad4L *rps3_b *rns *trnY trnF nad9_1 nad2_a rpl16<br>nad4 rps12 nad10 rpl2 rps4 nad7 (L)                                                                                                                                                                                                                                                               | 1 region deletion,<br>1 gene loss                                                                                                                                     |
| <i>M. minuta</i> –<br><i>M. crassus</i>     | *nad5 *ccmF *cytb *trnM *rnl *cox2 *rpl14 *cox1<br>*nad4L *rps3_b *trnW *rns *trnY trnF nad9_1 nad2_a<br>rpl16 nad4 rps12 nad10 rpl2 rps4 nad7 nad1_b trnG atp9<br>nad3 trnH nad1_a (L)                                                                                                                                                                                                                    | 3 gene losses,<br>1 region deletion,<br>3 gene gains,<br>1 inversion                                                                                                  |
| <i>O. trifallax</i> (I)                     | *rps2_sin *nad5 *nad5_iii_sin *nad5_ii_sin *nad5_i_sin<br>*ccmF *nad1_a *trnH *cob *nad3 *rpl6_ii_sin<br>*rpl6_i_sin *rps7 *rps3_a_sin *atp9 *rps8_sin2 *trnG<br>*nad1_b *rps14 *nad7 *rps4 *rps13 *rps19 *rpl2 *nad10<br>*rps12 *nad4_i_sin *rpl16 *nad2_a_sin *nad2_b *trnL<br>*rps10 *trnE *nad9 *nad9_i_sin *trnF trnY trnW rps3_b<br>nad4L cox1 nad6_sin rpl14 cox2 trnM (L)                          | 4 gene gains,<br>3 region insertions,<br>3 gene substitutions,<br>2 duplications                                                                                      |

| Node                                              | Chromosome Structure                                                                                                                                                                                                                                                                         | Events                                                                                                                                                                                                                |
|---------------------------------------------------|----------------------------------------------------------------------------------------------------------------------------------------------------------------------------------------------------------------------------------------------------------------------------------------------|-----------------------------------------------------------------------------------------------------------------------------------------------------------------------------------------------------------------------|
| <b><i>M. minuta</i> –<br/><i>O. trifallax</i></b> | *nad5 *ccmF *nad1_a *trnH *cob *nad3 *atp9 *trnG<br>*nad1_b *rps14 *nad7 *rps4 *rps13 *rps19 *rpl2 *nad10<br>*rps12 *nad4 *rpl16 *nad2_a *trnE *nad9_1 *trnF trnY<br>trnW rps3_b nad4L cox1 rpl14 cox2 trnM (L)                                                                              | 4 gene gains,<br>1 inversion,<br>1 transposition,<br>2 transversions,<br>1 insertion of circular<br>chromosome into linear one                                                                                        |
| <b><i>N. ovalis</i> (I)</b>                       | nad1_b nad1_a nad3 nad9_1 nad4 nad10 nad4L rpl14<br>nad2_a nad5 rpl2a_sin rpl2 nad7 rps14_sin rps8_sin1<br>rps4_sin rpl6 rps12 (L)                                                                                                                                                           | 5 gene losses,<br>1 region insertion,<br>1 duplication,<br>1 gene substitution,<br>4 transpositions,<br>1 insertion of circular<br>chromosome into linear one                                                         |
| <b><i>M. minuta</i> –<br/><i>N. ovalis</i></b>    | nad1_b atp9 rpl6 rps12 nad10 rpl2 rps19 rps13 nad7<br>rps14 *trnW *trnY trnF nad9_1 trnE nad2_a nad5 nad4L<br>cox1 rpl14 cox2 trnM nad4 (L)<br>trnH nad1_a nad3 cob(C)                                                                                                                       | 4 region deletion,<br>3 gene losses,<br>1 inversion,<br>3 transpositions,<br>2 transversions,<br>1 insertion of circular<br>chromosome into linear<br>one,<br>1 deletion of circular<br>chromosome from linear<br>one |
| <b>The tree root</b>                              | *cob *nad1_a *yejR *ymf61 *trnH *nad3 *nad4L *rpl14<br>*ymf62 *cox1 *ymf68 *trnW *ymf56 *rns_b *rns_a<br>*ymf66 *rps13 *rps3 *rps19 *rpl2 *nad10 *rps12<br>nad9_1 trnE nad2_a nad5 cox2 trnM rpl16 ymf59 ymf65<br>nad7 rps14 nad4 ymf57 ymf60 *ymf64 *trnF trnY (L)<br>nad1_b ymf63 atp9 (C) | –                                                                                                                                                                                                                     |
